# Supplementary material
Source: Springer Nature journal article supplement (https://www.springermedizin.de/resource/supplementary/13012_2011_454_MOESM3_ESM.pdf/9630194)

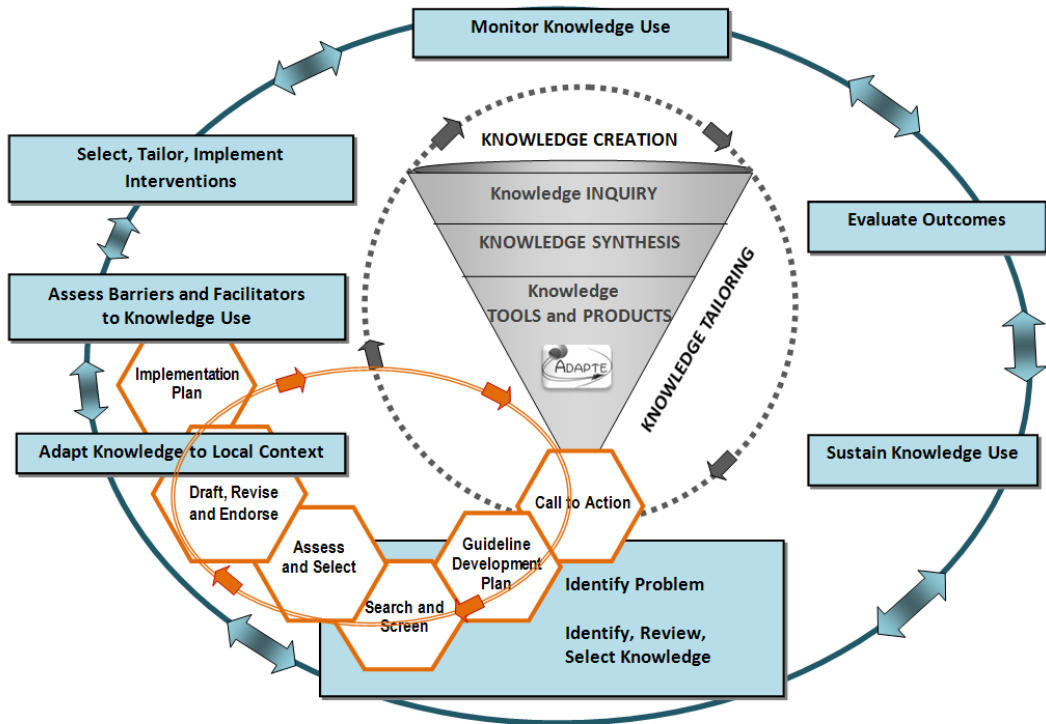

## ACTION CYCLE (Application)

Supplement: MOESM3 [file 9630194]
